# Supplementary material for: Single cell analysis of kynurenine and System L amino acid transport in T cells
Source: PubMed Central journal article supplement (PMC5958064; doi:10.1038/s41467-018-04366-7), 2018-05-17
Supplement: 41467_2018_4366_MOESM1_ESM.pdf [file 41467_2018_4366_MOESM1_ESM.pdf]

Supplementary Information

**Single cell analysis of kynurenine and System L amino acid transport in T cells**

Sinclair et al

Supplementary Figure 1

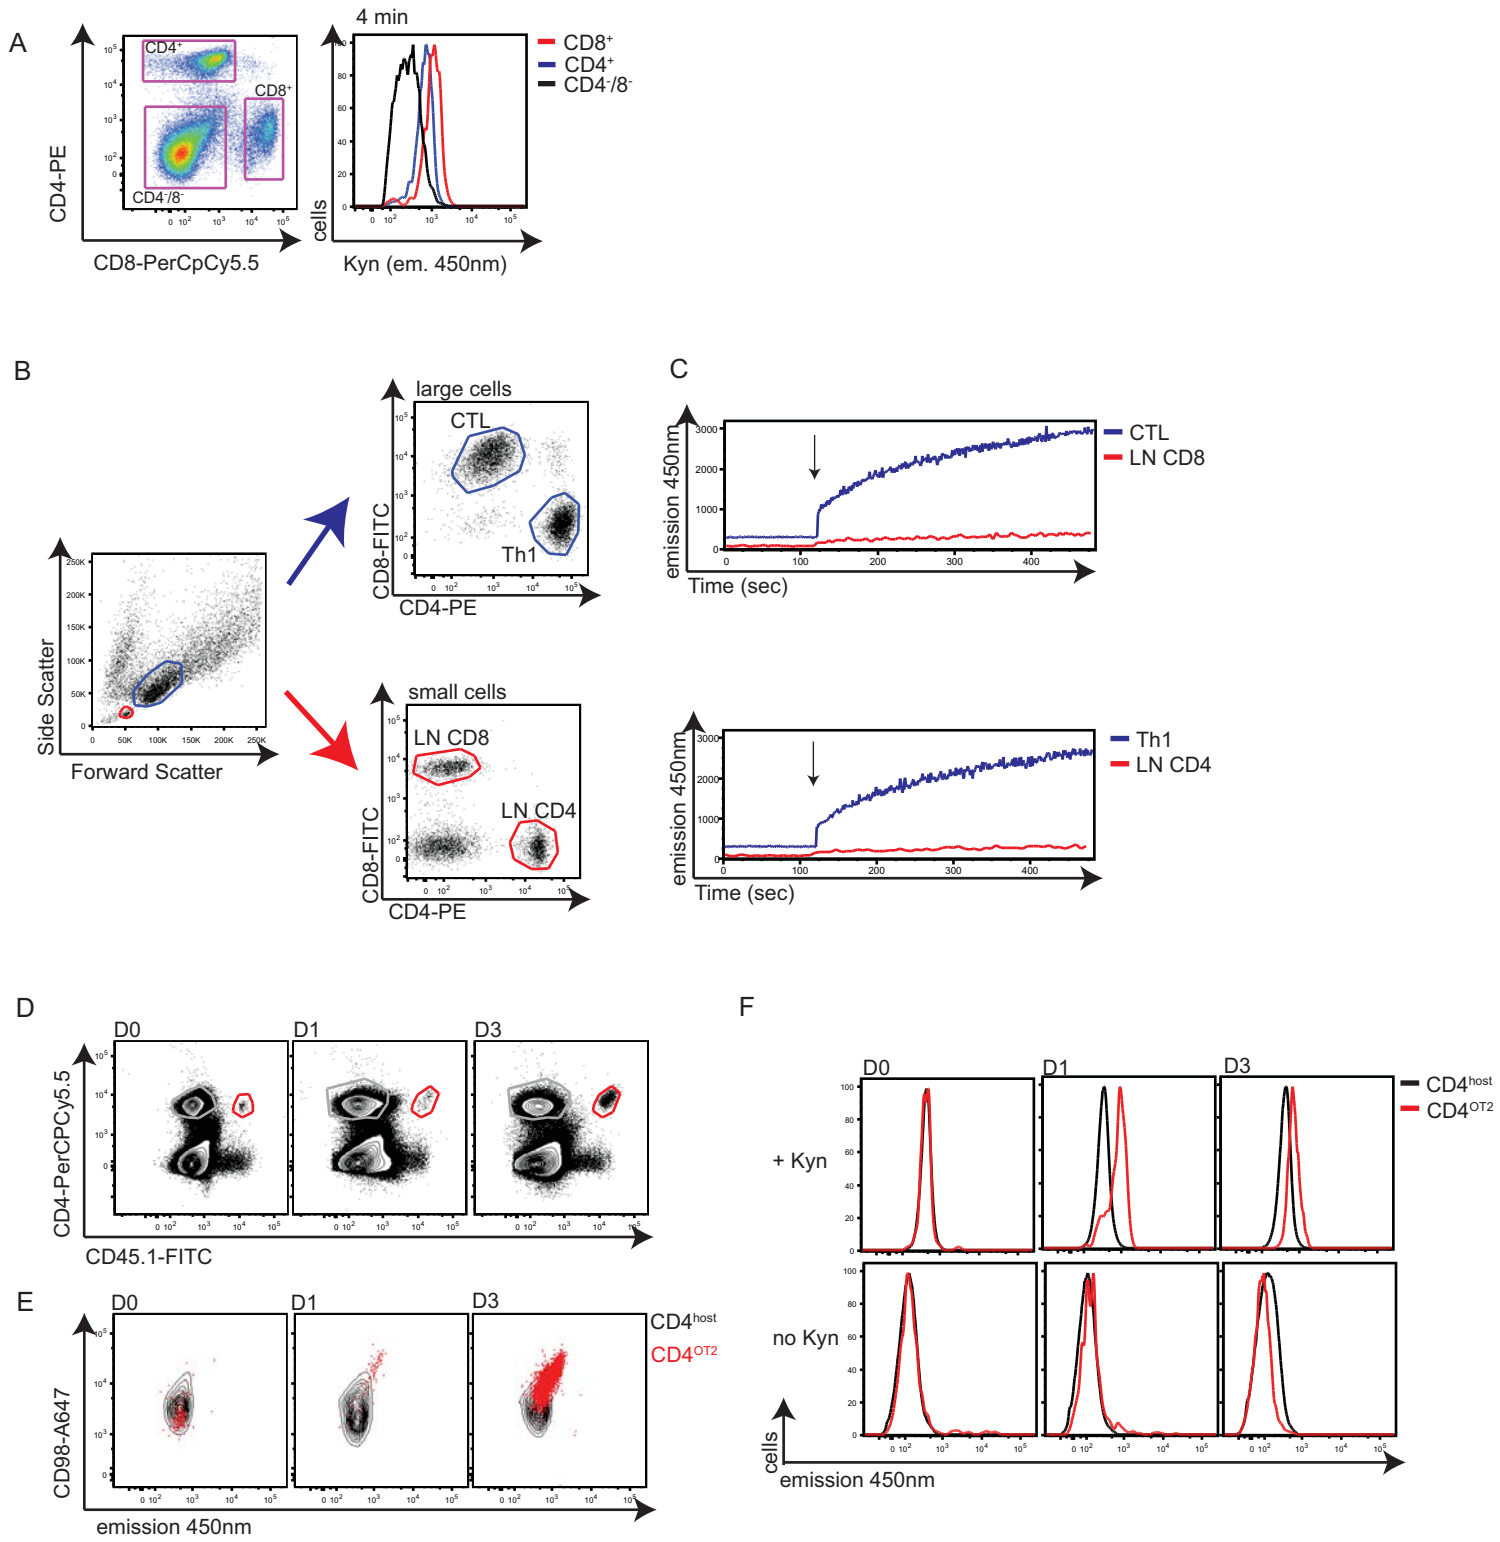

### Supplementary Figure 1 Legend

**a)** Splenocytes were activated using anti-CD3/CD28 antibodies for 24h. The data show representative flow cytometry profiles of the gating strategy used to identify CD4<sup>+</sup>, CD8<sup>+</sup> and CD4<sup>-</sup>/CD8<sup>-</sup> populations (left panel). The overlaid histograms (right panel) show 450nm emission in CD4<sup>+</sup> or CD8<sup>+</sup> T cells or the CD4<sup>-</sup>/CD8<sup>-</sup> gate after 4 mins (37°C ) with kynurenine (200µM).

**b,c)** *In vitro* generated effector CTL and TH1 were mixed with LN cells, prior to analysing live kynurenine uptake by flow cytometry. **b)** The gating strategy used to identify CD4<sup>+</sup> and CD8<sup>+</sup> LN and effector T cells. **c)** Kynurenine uptake in CTLs and LN CD8<sup>+</sup> T cells (top panel) or TH1 and LN CD4<sup>+</sup> T cells (bottom panel). Data acquired using 405nm excitation from the violet laser and band pass filter 450+/-50 on BD LSRII (Fortessa). Data acquired pre (120sec) and post (+600sec) addition of 200µM kynurenine (indicated by red arrow). The data are plotted as a geometric mean trace (FlowJo software).

**d-f)** OT2 (CD45.1) cells were adoptively transferred into WT CD45.2 hosts and immunised with NP-OVA/alum. The transferred OT2 cells were analysed on D0, D1 and D3 post-immunisation. **d)** The gating strategy to identify transferred OT2 (CD4<sup>+</sup>, CD45.1<sup>+</sup>) and host (CD4<sup>+</sup>, CD45.1<sup>-</sup>) T cells. **e)** the data show representative kynurenine uptake and CD98 staining on transferred OT2 CD4<sup>+</sup> T cells compared with host CD4<sup>+</sup> T cells after NP-OVA immunisation. **f)** The overlaid histograms show 450nm emission in OT2 CD4<sup>+</sup> or host CD4<sup>+</sup> T cells after 4 mins (37°C ) with or without kynurenine (200µM).

Data shown are representative of 3 biological replicates.
